# Supplementary material
Source: publisher site journal article supplement (https://www.dovepress.com/article/213581)
Supplement: Supplementary file 1 [file get_supplementary_file.php]

**
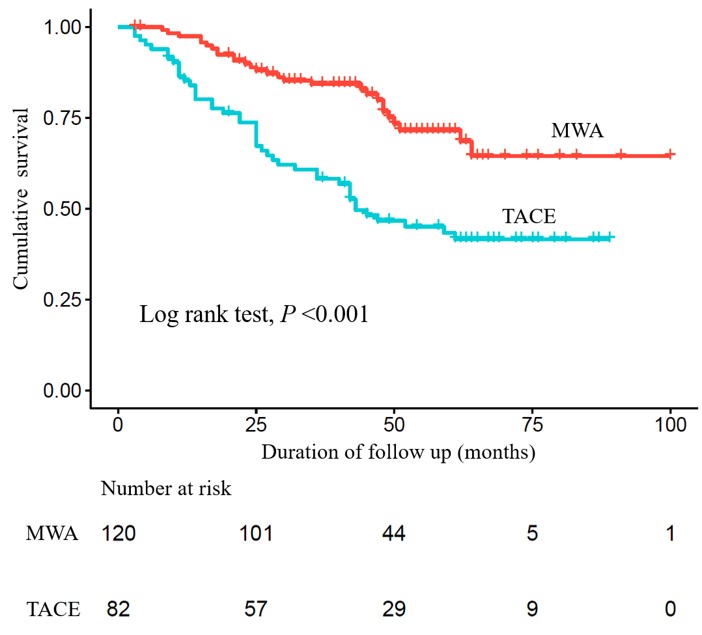
**

**Figure S1** Comparison of the overall survival of HCC patients between the MWA group and the TACE group before PSM. Significantly better survival was found for HCC patients undergoing MWA.


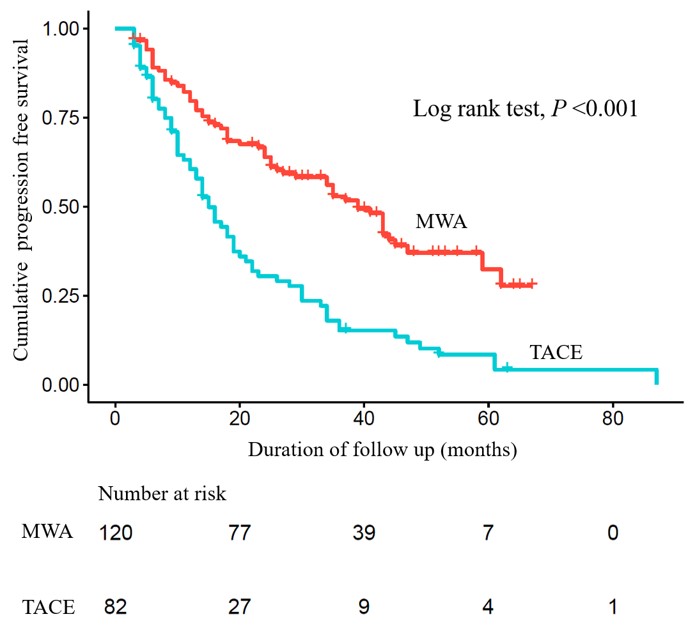


**Figure S2** Comparison of the progression free survival of HCC patients between the MWA group and the TACE group before PSM. Significantly better PFS was found for HCC patients undergoing MWA.

| Table S1 Outcomes of treatment response | | | | | | | |
| --- | --- | --- | --- | --- | --- | --- | --- |
|  | Unmatched cohort | | |  | Matched cohort | | |
| MWA (n=120) | TACE (n=82) | P value |  | MWA (n=58) | TACE (n=58) | P value |
| Number of procedures | 1.1±0.3 | 1.2±0.5 | 0.019 |  | 1.1±0.3 | 1.3±0.6 | 0.056 |
| 1 | 109 | 65 |  |  | 51 | 43 |  |
| 2 | 11 | 16 |  |  | 7 | 14 |  |
| 3 | 0 | 1 |  |  | 0 | 1 |  |
| Treatment response |  |  | <0.001 |  |  |  | <0.001 |
| CR | 118 (98.3%) | 57 (69.5%) |  |  | 58 (100.0%) | 42 (72.4%) |  |
| PR | 2 (1.7%) | 22 (26.8%) |  |  | 0 | 15 (25.9%) |  |
| SD | 0 | 3 (3.7%) |  |  | 0 | 1 (1.7%) |  |
| PD | 0 | 0 |  |  | 0 | 0 |  |
| CR, complete response (disappearance of any arterial enhancement in the lesion);  PR, partial response (decrease ≥30 % of in the diameter of viable arterial enhancement in the lesion);  PD, progressive disease (an increase of at least 20% in the diameters of viable arterial enhancement in the lesion);  SD, stable disease (all other cases) | | | | | | | |
